# Supplementary material for: Reprogramming to pluripotency does not require transition through a primitive streak-like state
Source: PubMed Central journal article supplement (PMC5707390; doi:10.1038/s41598-017-15187-x), 2017-11-29

# Reprogramming to pluripotency does not require transition through a primitive streak-like state

Stefanie Raab<sup>1#</sup>, Moritz Klingenstein<sup>1#</sup>, Anna Möller<sup>2#</sup>, Anett Illing<sup>2</sup>, Jelena Tosic<sup>3,4,5</sup>, Markus Breunig<sup>2</sup>, Georg Kuales<sup>3</sup>, Leonhard Linta<sup>1</sup>, Thomas Seufferlein<sup>2</sup>, Sebastian J. Arnold<sup>3,6§</sup>, Alexander Kleger<sup>2§</sup>, Stefan Liebau<sup>1§</sup>

<sup>1</sup> Institute of Neuroanatomy & Developmental Biology (INDB), Eberhard Karls University Tuebingen, Oesterbergstr. 3, 72074 Tuebingen, Germany

<sup>2</sup> Department of Internal Medicine I, University Medical Center Ulm, Albert-Einstein-Allee 23, 89081 Ulm, Germany

<sup>3</sup> Institute of Experimental and Clinical Pharmacology and Toxicology II, Faculty of Medicine, University of Freiburg, Freiburg, Germany

<sup>4</sup> Spemann Graduate School of Biology and Medicine (SGBM), Albert-Ludwigs-University Freiburg, Freiburg, Germany

<sup>5</sup> Faculty of Biology, Schänzlestraße 1, Albert-Ludwigs-University Freiburg, Freiburg, Germany

<sup>6</sup> BIOS Centre of Biological Signalling Studies, Albert-Ludwigs-University, Freiburg, Germany.

# contributed equally

§ contributed equally

## Corresponding authors:

### Dr. Sebastian J Arnold

Email: [sebastian.arnold@pharmakol.uni-freiburg.de](mailto:sebastian.arnold@pharmakol.uni-freiburg.de)

Phone: +49-761-203-96819

Fax: +49-731-203-96820

Institute of Clinical and Experimental Pharmacology and Toxicology

Albertstr. 25

79104 Freiburg, Germany

### Prof. Dr. Alexander Kleger

Email: [alexander.kleger@uni-ulm.de](mailto:alexander.kleger@uni-ulm.de)

Phone: +49-731-500-44728

Fax: +49-731-500-44665

Department of Internal Medicine I, University Medical Center Ulm

Albert-Einstein-Allee 23

89081 Ulm, Germany

### Prof. Dr. Stefan Liebau

Email: [stefan.liebau@uni-tuebingen.de](mailto:stefan.liebau@uni-tuebingen.de)

Phone: +49-7071-2978233

Fax: +49-7071-294014

Institute of Neuroanatomy & Developmental Biology (INDB), Eberhard Karls University Tübingen

Österbergstr. 3

72074 Tübingen

## **Supplemental figure legend**

### **Supplemental figure 1: Expression profiles of human somatic cells during reprogramming display primitive streak and mesendoderm signatures**

(A) Schematic overview of the epithelial-to-mesenchymal transition (EMT) and the early steps of human embryonic development. The blastocyst includes the first differentiated cells in human development – the pluripotent inner cell mass or embryoblast and the trophoblast. The pluripotent embryoblast cells differentiate to the so called germinal disc, composed of epiblast and hypoblast. Gastrulation starts when cells of the epiblast form the primitive streak undergo EMT and migrate between hypo- and epiblast. The cells integrating and exchanging the former hypoblast give rise to the endoderm. The cells between the two disks differentiate to mesoderm, while the remaining cells in the epiblast have ectodermal fate. Keratinocytes are known to differentiate from the ectoderm while fibroblasts are of mesoderm origin. **(B,C)** Expression patterns during reprogramming of fibroblasts **(B)** keratinocytes **(C)**. Single marker gene profiles for genes expressed during primitive streak and mesendoderm formation in reprogramming keratinocytes and fibroblasts towards pluripotency are shown.

**Supplemental figure 2: Expression profile for Eomesodermin (Eomes) during reprogramming of mouse embryonic fibroblasts.** Time points as indicated.

A

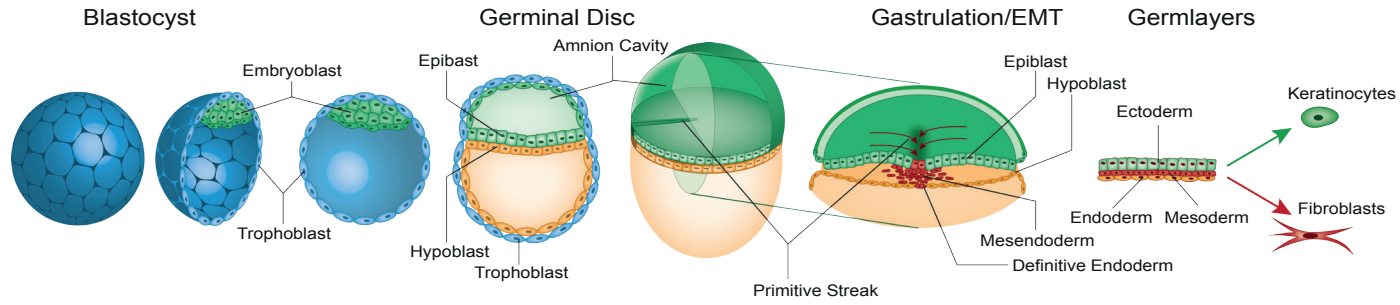

B

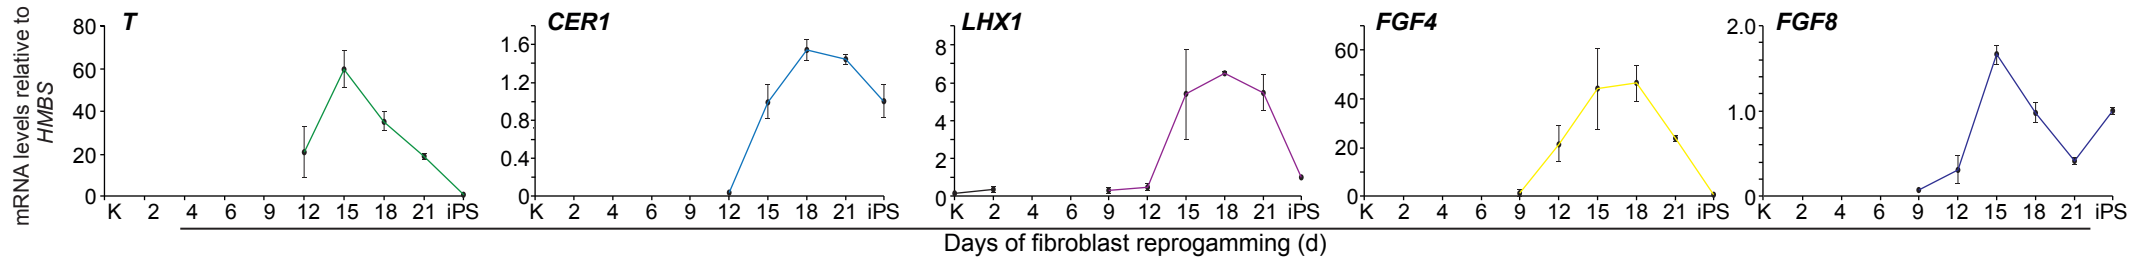

C

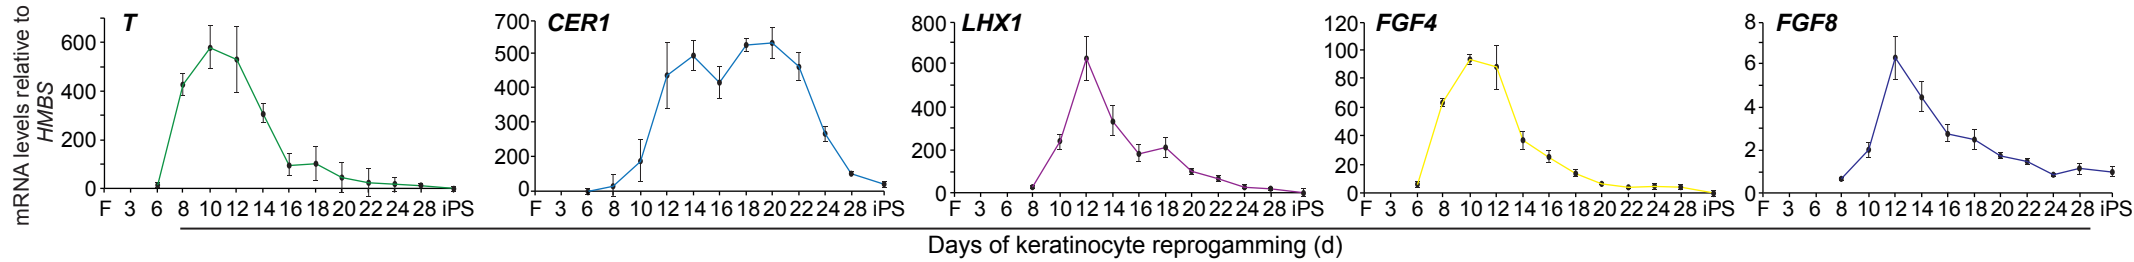

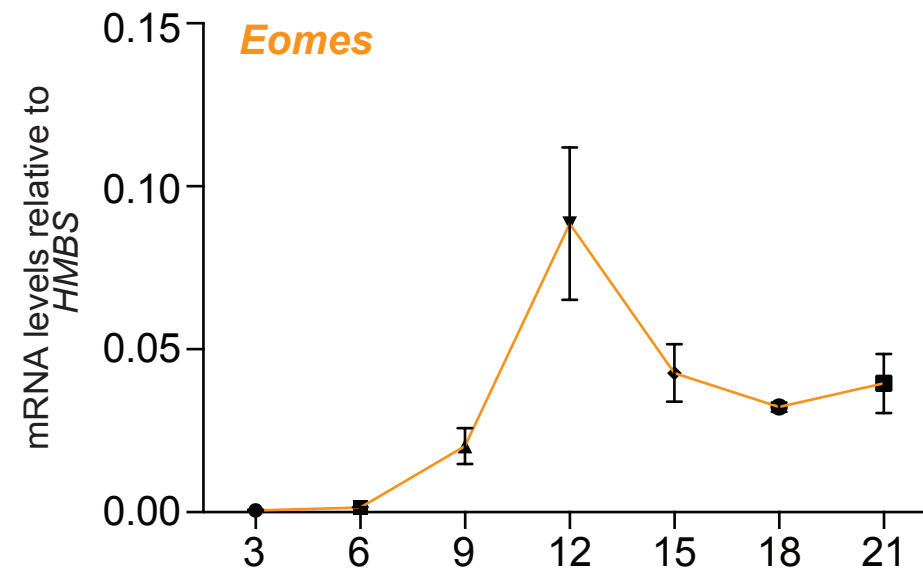

Supplement: 41598_2017_15187_MOESM1_ESM.pdf [file 41598_2017_15187_MOESM1_ESM.pdf]
